# Supplementary material for: Variations in T cell transcription factor gene structure and expression associated with the two disease forms of sheep paratuberculosis
Source: PubMed Central journal article supplement (PMC4988036; doi:10.1186/s13567-016-0368-3), 2016-08-17
Supplement: 13567_2016_368_MOESM1_ESM.pdf [file 13567_2016_368_MOESM1_ESM.pdf]

**Additional File 1     Primer sets for RT-qPCR**

| Gene           | Primer sequences                                          | T <sub>m</sub> °C | Product size (bp) |
|----------------|-----------------------------------------------------------|-------------------|-------------------|
| <i>TBX21</i>   | F: CCTGTTGTGGTCCAAGTTC<br>R: CGGTAATGGCTGGTGGGCTC         | 60                | 120               |
| <i>GATA3</i>   | F: CCACAAGATGAACGGACAG<br>R: GGCATTTCTTCTCCACAGAGTCGT     | 62                | 129               |
| <i>GATA3v1</i> | F: GCGAGATCCAGCACAGGCC<br>R: GTTCTGTCCGTTTCATCTTGTGG      | 60                | 131               |
| <i>RORC2</i>   | F: CGCTGTGCCACCCGACTCACCGAG<br>R: TGACCAGCACCACTTCCATG    | 62                | 136               |
| <i>RORC2v1</i> | F: TTGAAGGCTGCAGTGAACTC<br>R: GGCATTGATGAGCACGAGG         | 63                | 116               |
| <i>RORAv1</i>  | F: GTGATCGCAGCGATGAAAGC<br>R: CCTTGCAGCCTTCACATGTAATG     | 60                | 101               |
| <i>RORAv2</i>  | F: AGTTCTCTGCTGCAGTTGCTAAC<br>R: GACGAGCTCATGGGCAAGG      | 62                | 124               |
| <i>RORAv3</i>  | F: TGCGCAGACAGAGCTATTCC<br>R: TGGGTCTTCTTTGTTACTGAGATACC  | 62                | 112               |
| <i>RORAv4</i>  | F: GCAGCTTTCTTCTGGTGTGTC<br>R: TGGGTCTTCTTTGTTACTGAGATACC | 60                | 113               |
| <i>RORAv5</i>  | F: GGCTTTCTGTGGATGGGATC<br>R: TGGGTCTTCTTTGTTACTGAGATACC  | 60                | 133               |
| <i>YWHAZ</i>   | F: TGTAGGAGCCCGTAGGTCATC<br>R: TCTCTCTGTATTCTCGAGCCATC    | 60                | 101               |
| <i>SDHA</i>    | F: ACCTGATGCTTTGTGCTCTGC<br>R: CCTGGATGGGCTTGGAGTAA       | 62                | 126               |
